# Supplementary material
Source: PubMed Central journal article supplement (PMC6663884)
Supplement: supp_RA119.007679_Supplemental_Material_TableS1.pdf [file supp_RA119.007679_Supplemental_Material_TableS1.pdf]

Virion-associated, host-derived DHX9/RNA helicase A enhances the processivity of HIV-1 reverse transcriptase on genomic RNA

**Samantha Brady<sup>1</sup>, Gatikrushna Singh<sup>2</sup>, Cheryl Bolinger<sup>3&</sup>, Zhenwei Song<sup>1</sup>, Ioana Boeras<sup>2#</sup>, Kexin Weng<sup>1</sup>, Bria Trent<sup>1</sup>, William Clay Brown<sup>4</sup>, Kamalendra Singh<sup>5,6</sup>, Kathleen Boris-Lawrie<sup>2,3\*</sup>, and Xiao Heng<sup>1\*</sup>**

<sup>1</sup> Department of Biochemistry, University of Missouri, Columbia, MO, 65211. <sup>2</sup> Department of Veterinary and Biomedical Sciences, University of Minnesota, Saint Paul, MN, 55108. <sup>3</sup> Department of Veterinary Biosciences, Ohio State University, Columbus, OH 432105. <sup>4</sup> Center for Structural Biology, Life Sciences Institute, University of Michigan, Ann Arbor, MI, 48109. <sup>5</sup> Department of Molecular Microbiology and Immunology, <sup>6</sup> Bond Life Sciences Center, University of Missouri, Columbia, MO, 65211.

Running title: *DHX9/RHA enhances RT's processivity*

& Present address: Intrexon Corporation, Gaithersburg, MD, 20876

# Present address: College of Sciences, Lucian Blaga University, Sibiu, Romania, 550012

\*To whom correspondence should be addressed: Xiao Heng: Department of Biochemistry, University of Missouri, Columbia, MO, 65211; [hengx@missouri.edu](mailto:hengx@missouri.edu); Tel. (573) 882-3953 and Kathleen Boris-Lawrie: Department of Veterinary and Biomedical Sciences, University of Minnesota, Saint Paul, MN, 55108; [kbl@umn.edu](mailto:kbl@umn.edu); Tel. (612) 625-2700

## Supporting Information

### Supporting Table S1

**Table S1. Primers**

| Name                                                        | Utility                 | Sequence                                                                   |
|-------------------------------------------------------------|-------------------------|----------------------------------------------------------------------------|
| <b>Mutagenesis primers</b>                                  |                         |                                                                            |
| KB1216                                                      | RHA m903-907 sense      | 5' GAA AGC GGC TGG GCT ATA TTC ACA GGA ACT TTG CTG<br>GAA ACA GAT TTT C 3' |
| KB1217                                                      | RHA m903-907 antisense  | 5' GAA AAT CTG TTT CCA GCA AAG TTC CTG TGA ATAT AGC<br>CCA GCC GCT TTC 3'  |
| KB1218                                                      | RHA m928-933 sense      | 5' GCC TGG GAT GAT GCT CGG ATG GGG GGC GAA GAG GCA<br>GAG ATA CGT TTT 3'   |
| KB1219                                                      | RHA m928-933 antisense  | 5' AAA CGT ATC TCT GCC TCT TCG CCC CCC ATC CGA GCA TCA<br>TCC CAG GC 3'    |
| <b>Quantitative real time PCR primer pairs (RT-product)</b> |                         |                                                                            |
| KB2284                                                      | Early product sense     | 5' GCC TCA ATA AAG CTT GCC TTG A 3'                                        |
| KB2285                                                      | Early product antisense | 5' TGA CTA AAA GGG TCT GAG GGA TCT 3'                                      |
| KB2363                                                      | Late product sense      | 5' TGT GTG CCC GTC TGT TGT GT 3'                                           |
| KB2364                                                      | Late product antisense  | 5' GAG TCC TGC GTC GAG AGA TC 3'                                           |
| KB3267                                                      | CCR5 sense              | 5' CCA GAA GAG CTG AGA CAT CCG 3'                                          |

|                                                                 |                   |                                                                                |
|-----------------------------------------------------------------|-------------------|--------------------------------------------------------------------------------|
| KB2368                                                          | CCR5<br>antisense | 5' GCC AAG CAG CTG AGA GGT TAC T 3'                                            |
| <b>Primers for DNA template used for in vitro transcription</b> |                   |                                                                                |
| 5'UTR Forward Primer                                            |                   | 5'-GAA ATT AAT ACG ACT CAC TAT AGG TCT CTC TGG TTA<br>GAC CAG-3'               |
| 5'UTR Reverse Primer                                            |                   | 5'-CGC ACC CAT CTC TCT CCT TCT AGC C-3'                                        |
| 3'UTR Forward Primer                                            |                   | 5'-GAA TCT AAT ACG ACT CAC TAT AGG AGT ACT TCA AGA<br>ACT GCT GAC ATC GAG C-3' |
| 3'UTR Reverse Primer                                            |                   | 5'-GCT TTA TTG AGG CTT AAG CAG TGG GTT CCC TAG TTA GCC<br>AGA G-3'             |
